# Supplementary material for: The long noncoding RNA NARL regulates immune responses via microRNA-mediated NOD1 downregulation in teleost fish
Source: PubMed Central journal article supplement (PMC7966872; doi:10.1016/j.jbc.2021.100414), 2021-02-11
Supplement: mmc1.pdf [file mmc1.pdf]

**Supplemental Table 1.** PCR primer information in this study.

| <b>Primer</b>              | <b>Sequence (5'-3')</b>                              |
|----------------------------|------------------------------------------------------|
| <b>Real-time PCR</b>       |                                                      |
| NOD1-RT-F                  | TCGCACTCGTATTGGATG                                   |
| NOD1-RT-R                  | CACTGGTGAAAGGTAGG                                    |
| NARL-RT-F                  | GAGACAGTTCAACGAGGAC                                  |
| NARL-RT-R                  | TGCGGATGATGACAGAT                                    |
| TNF- $\alpha$ -RT-F        | GTTTGCTTGGTACTGGAATGG                                |
| TNF- $\alpha$ -RT-R        | TGTGGGATGATGATCTGGTTG                                |
| IL-1 $\beta$ -RT-F         | CATAAGGATGGGACAACGAG                                 |
| IL-1 $\beta$ -RT-R         | TAGGGGACGGACACAAGGGTA                                |
| IL-6-RT-F                  | GCGGTAAAGGCATGGATAT                                  |
| IL-6-RT-R                  | GTTGTAGTTGGAAGGGCAG                                  |
| IL-8-RT-F                  | AGCAGCAGAGTCTTCGT                                    |
| IL-8-RT-R                  | TCTTCGCAGTGGGAGTT                                    |
| GAPDH-RT-F                 | ACCTTCACTCCTCCATCTT                                  |
| GAPDH-RT-R                 | AGGTCACAGACACGGTTG                                   |
| miR-217-RT-F               | AGTACTGCATCAGGAACCTGA                                |
| miR-217-RT-R               | CCAGTTTTTTTTTTTTTTTGCCAATC                           |
| 5.8S-RT-F                  | AACTCTTAGCGGTGGATCA                                  |
| 5.8S-RT-R                  | GTTTTTTTTTTTTTTTGCCGAGTG                             |
| <b>Vector construction</b> |                                                      |
| NOD1-pcDNA3.1-F            | GACGATGACGACAAGAAGCTTATGTCGTGCCTGAACATCCTCA          |
| NOD1-pcDNA3.1-R            | TTAGTGCCAGTCAGTGGAAAGCGCAGCCTC                       |
| NOD1-3'UTR-F               | CGCGAGCTCAACAGAAACAGTTTGAGG                          |
| NOD1-3'UTR-R               | TGCTCTAGACTTCTTTCATTCACATTG                          |
| NOD1-3'UTR-mut-F           | GAGTGTAAGTCAGTGTCTGCTTCAATGGGAATACTG                 |
| NOD1-3'UTR-mut-R           | GAACTGACTTACACTCGATGCGTGCACGTTC                      |
| NOD1-3'UTR-mVenus-F        | CCCAAGCTTCGCTTCCACTGACTGGCACT                        |
| NOD1-3'UTR-mVenus-R        | CGCGGATCCACCAGCTATGAGCACCAGG                         |
| NOD1-3'UTR-mVenus-mut-F    | GAGTGTAAGTCAGTGTCTGCTTCAATGGGAATACTG                 |
| NOD1-3'UTR-mVenus-mut-R    | GAACTGACTTACACTCGATGCGTGCACGTTC                      |
| pcDNA3.1-MS2-NOD1-3'UTR-F  | ACTATAGGGAGACCCAAGCTTATGTAAAAATATGATGACATATGGTTAGAAT |
| pcDNA3.1-MS2-NOD1-3'UTR-R  | GCGGCCGTTACTAGTGGATCCAAACAAGCATAACACAGATTATACAGC     |
| NARL-pcDNA3.1-F            | ACTATAGGGAGACCCAAGCTTAGCTGCCCGCACAACCT               |
| NARL-pcDNA3.1-R            | TGATGGATATCTGCAGAATTCCTATGCAAACCTTTTACGCATGACTC      |
| NARL-pmirGLO-F             | TGTTTTAAACGAGCTCGCTAGCGGAAGAGGGCGTAGGCTCG            |
| NARL-pmirGLO-R             | CAGGTCGACTCTAGACTCGAGGTGATTCTTTCCTACACACGGTAGAA      |
| NARL-pmirGLO-mut-F         | CAGAACCTACTGCGTTCTTTTTCTGAGACTAATAAATGCA             |
| NARL-pmirGLO-mut-R         | AAACGCAGTAGGTTCTGAACTATCTCTTAAACCAAATCACA            |
| NARL-mVenus-F              | TCAGATCTCGAGCTCAAGCTTGGAAAGAGGGCGTAGGCTCG            |
| NARL-mVenus-R              | CGGGCCCGGTTACCGTCGACGTGATTCTTTCCTACACACGGTAGAA       |

|                               |                                                     |
|-------------------------------|-----------------------------------------------------|
| NARL-mVenus-mut-F             | CAGAACCTACTGCGTTTCTTTTTCTGAGACTAATAAATGCA           |
| NARL-mVenus-mut-R             | AAACGCAGTAGGTTCTGAACTATCTCTTTAACCAAATCACA           |
| pcDNA3.1-MS2-NARL-F           | ACTATAGGGAGACCCAAGCTTAGCTGCCCGCGCACAAC              |
| pcDNA3.1-MS2-NARL-R           | GCGGCCGTTACTAGTGGATCCCTATGCAAACCTTTTACGCATGACTC     |
| pcDNA3.1-MS2-NARL-mut-F       | CAGAACCTACTGCGTTTCTTTTTCTGAGACTAATAAATGCA           |
| pcDNA3.1-MS2-NARL-mut-R       | AAACGCAGTAGGTTCTGAACTATCTCTTTAACCAAATCACA           |
| NARL-T7-F                     | TAATACGACTCACTATAGGGAGCTGCCCGCGCACAAC               |
| NARL-T7-R                     | CTATGCAAACCTTTTACGCATGACTC                          |
| <i>Ler</i> NOD1-3'UTR-F       | CGCGAGCTCACTGGCACTAACGAGAGG                         |
| <i>Ler</i> NOD1-3'UTR-R       | TGCTCTAGAAAGGTCCATGAAGGAGGA                         |
| <i>Ler</i> NOD1-3'UTR-mut-F   | ACGTGTAAGTCAGTGTGTGTTCACTATCCGCTTC                  |
| <i>Ler</i> NOD1-3'UTR-mut-R   | CACACTGACTTACACGTGTCGGTGACGTTCC                     |
| <i>Ler</i> NARL-pcDNA3.1-F    | ACTATAGGGAGACCCAAGCTTAGCTGCCCGCGCACAAC              |
| <i>Ler</i> NARL-pcDNA3.1-R    | TGATGGATATCTGCAGAATTCCTATGCAAACCTTTTACGCATGACTC     |
| <i>Ler</i> NARL-pmirGLO-F     | TGTTTAAACGAGCTCGCTAGCGGAAGAGGGCGTAGGCTCG            |
| <i>Ler</i> NARL-pmirGLO-R     | CAGGTCGACTCTAGACTCGAGGTGATTCTTTCCTACACACGGTAGAA     |
| <i>Ler</i> NARL-pmirGLO-mut-F | CAGAACCTACTGCGTTTCTTTTTCTGAGACTAATAAATGCA           |
| <i>Ler</i> NARL-pmirGLO-mut-R | AAACGCAGTAGGTTCTGAACTATCTCTTTAACCAAATCACA           |
| <i>Ndi</i> NOD1-3'UTR-F       | CGCGAGCTCGAAACCAGCTCACTGACC                         |
| <i>Ndi</i> NOD1-3'UTR-R       | TGCTCTAGACACATTGAATGCACCACA                         |
| <i>Ndi</i> NOD1-3'UTR-mut-F   | GAGTGTAAGTCAGTGTGTGTTCACTGTCCGCT                    |
| <i>Ndi</i> NOD1-3'UTR-mut-R   | CACACTGACTTACACTCGATCGTGCCGTTCTCT                   |
| <i>Ndi</i> NARL-pcDNA3.1-F    | ACTATAGGGAGACCCAAGCTTAGCTGCCCGCGCACAAC              |
| <i>Ndi</i> NARL-pcDNA3.1-R    | TGATGGATATCTGCAGAATTCCTATGCAAACCTTTTACGCATGACTC     |
| <i>Ndi</i> NARL-pmirGLO-F     | TGTTTAAACGAGCTCGCTAGCGGAAGAGGGCGTAGGCTCG            |
| <i>Ndi</i> NARL-pmirGLO-R     | CAGGTCGACTCTAGACTCGAGGTGATTCTTTCCTACACACGGTAGAA     |
| <i>Ndi</i> NARL-pmirGLO-mut-F | CAGAACCTACTGCGTTTCTTTTTCTGAGACTAATAAATGCA           |
| <i>Ndi</i> NARL-pmirGLO-mut-R | AAACGCAGTAGGTTCTGAACTATCTCTTTAACCAAATCACA           |
| miR-217-5p-sensor-F           | TCGAGTTGTCATTCTCAAATACACGACTTGTCATTCTCAAATACACGACGC |
| miR-217-5p sensor-R           | GGCCGCGTCGTGATTTGAGAATGACAAGTCGTGATTTGAGAATGACAAC   |
