# Supplementary material for: The long noncoding RNA NARL regulates immune responses via microRNA-mediated NOD1 downregulation in teleost fish
Source: PubMed Central journal article supplement (PMC7966872; doi:10.1016/j.jbc.2021.100414), 2021-02-11
Supplement: mmc2.pdf [file mmc2.pdf]

**Supplemental Table 2.** The differentially expressed lncRNAs obtained after SCR V and LPS stimulation.

| lncRNA      | SCR V-Ctrl      |         |            | LPS-Ctrl        |         |            |
|-------------|-----------------|---------|------------|-----------------|---------|------------|
|             | log2Fold Change | p-value | regulation | log2Fold Change | p-value | regulation |
| MSTRG.10039 | -2.84           | 0.15    | down       | -2.27           | 0.26    | down       |
| MSTRG.10537 | -1.93           | 0.29    | down       | -1.87           | 0.32    | down       |
| MSTRG.10671 | -1.65           | 0.23    | down       | -1.62           | 0.24    | down       |
| MSTRG.10696 | 1.07            | 0.40    | up         | 1.61            | 0.36    | up         |
| MSTRG.108   | -1.27           | 0.67    | down       | 1.64            | 0.27    | up         |
| MSTRG.10943 | 1.19            | 0.25    | up         | -2.19           | 0.16    | down       |
| MSTRG.10948 | -1.09           | 0.49    | down       | -1.86           | 0.36    | down       |
| MSTRG.11011 | -6.36           | 0.02    | down       | -1.13           | 0.65    | down       |
| MSTRG.11012 | 1.26            | 0.63    | up         | 1.82            | 0.48    | up         |
| MSTRG.11093 | -1.39           | 0.23    | down       | 2.46            | 0.33    | up         |
| MSTRG.1119  | 1.38            | 0.57    | up         | 1.76            | 0.37    | up         |
| MSTRG.11427 | -1.35           | 0.26    | down       | -1.14           | 0.35    | down       |
| MSTRG.11555 | 1.14            | 0.30    | up         | 1.22            | 0.28    | up         |
| MSTRG.11586 | -9.68           | 0.00    | down       | -1.00           | 0.64    | down       |
| MSTRG.11605 | -12.67          | 0.00    | down       | -1.67           | 0.06    | down       |
| NARL        | 14.05           | 0.00    | up         | 14.14           | 0.00    | up         |
| MSTRG.11620 | -1.17           | 0.33    | down       | 1.48            | 0.27    | up         |
| MSTRG.11622 | -1.23           | 0.30    | down       | 1.34            | 0.21    | up         |
| MSTRG.11624 | -1.05           | 0.47    | down       | -1.03           | 0.50    | down       |
| MSTRG.11677 | 1.98            | 0.17    | up         | -1.07           | 0.31    | down       |
| MSTRG.11749 | 2.25            | 0.08    | up         | 2.77            | 0.21    | up         |
| MSTRG.1175  | -1.25           | 0.30    | down       | -1.69           | 0.16    | down       |
| MSTRG.11898 | -1.53           | 0.17    | down       | -1.77           | 0.14    | down       |
| MSTRG.12133 | 5.07            | 0.03    | up         | -5.41           | 0.00    | down       |
| MSTRG.12536 | 1.29            | 0.34    | up         | -2.26           | 0.05    | down       |
| MSTRG.12658 | 1.28            | 0.62    | up         | 1.66            | 0.41    | up         |
| MSTRG.12686 | -13.59          | 0.00    | down       | -1.45           | 0.57    | down       |
| MSTRG.12839 | 1.35            | 0.59    | up         | 1.32            | 0.12    | up         |
| MSTRG.13069 | -1.08           | 0.50    | down       | 17.23           | 0.00    | up         |
| MSTRG.13102 | 1.88            | 0.45    | up         | -1.22           | 0.43    | down       |
| MSTRG.13159 | -4.92           | 0.05    | down       | -13.01          | 0.00    | down       |
| MSTRG.13477 | -1.83           | 0.17    | down       | -1.82           | 0.20    | down       |
| MSTRG.13828 | -2.75           | 0.17    | down       | -1.09           | 0.53    | down       |
| MSTRG.13889 | 1.41            | 0.44    | up         | -1.17           | 0.59    | down       |
| MSTRG.13977 | -4.14           | 0.01    | down       | 1.27            | 0.34    | up         |
| MSTRG.14019 | -2.04           | 0.16    | down       | -4.83           | 0.00    | down       |
| MSTRG.14034 | -1.26           | 0.45    | down       | -1.49           | 0.27    | down       |
| MSTRG.14085 | 1.98            | 0.13    | up         | 1.32            | 0.31    | up         |

|             |        |      |      |        |      |      |
|-------------|--------|------|------|--------|------|------|
| MSTRG.14095 | -11.78 | 0.00 | down | -1.83  | 0.36 | down |
| MSTRG.14150 | 2.39   | 0.16 | up   | -2.31  | 0.10 | down |
| MSTRG.14169 | -1.87  | 0.17 | down | -1.60  | 0.24 | down |
| MSTRG.14260 | -14.09 | 0.00 | down | -14.09 | 0.00 | down |
| MSTRG.14261 | -3.52  | 0.17 | down | -1.09  | 0.59 | down |
| MSTRG.14373 | -13.05 | 0.00 | down | -4.21  | 0.03 | down |
| MSTRG.14455 | -3.44  | 0.09 | down | 15.52  | 0.00 | up   |
| MSTRG.14566 | 1.42   | 0.18 | up   | -1.70  | 0.14 | down |
| MSTRG.14578 | -4.98  | 0.03 | down | -4.99  | 0.02 | down |
| MSTRG.14790 | -13.17 | 0.00 | down | -13.17 | 0.00 | down |
| MSTRG.14805 | 3.68   | 0.04 | up   | 3.74   | 0.04 | up   |
| MSTRG.14807 | -8.24  | 0.00 | down | -1.06  | 0.68 | down |
| MSTRG.14839 | -2.34  | 0.26 | down | -1.97  | 0.25 | down |
| MSTRG.15193 | -1.99  | 0.12 | down | -1.01  | 0.39 | down |
| MSTRG.15662 | -2.57  | 0.22 | down | 1.42   | 0.21 | up   |
| MSTRG.15702 | 4.30   | 0.09 | up   | 5.33   | 0.03 | up   |
| MSTRG.15705 | 1.32   | 0.30 | up   | 1.30   | 0.30 | up   |
| MSTRG.15722 | 1.60   | 0.46 | up   | 2.50   | 0.15 | up   |
| MSTRG.15732 | -1.72  | 0.40 | down | -12.27 | 0.00 | down |
| MSTRG.15761 | -1.57  | 0.55 | down | -1.18  | 0.46 | down |
| MSTRG.15821 | -1.57  | 0.39 | down | -1.43  | 0.37 | down |
| MSTRG.15906 | -1.18  | 0.36 | down | 1.05   | 0.40 | up   |
| MSTRG.16060 | -2.67  | 0.10 | down | -4.06  | 0.01 | down |
| MSTRG.16127 | -12.33 | 0.00 | down | -1.19  | 0.65 | down |
| MSTRG.16542 | -1.49  | 0.48 | down | 3.95   | 0.12 | up   |
| MSTRG.16543 | -1.76  | 0.06 | down | -1.20  | 0.18 | down |
| MSTRG.16549 | 3.27   | 0.04 | up   | 2.48   | 0.13 | up   |
| MSTRG.16810 | 1.04   | 0.40 | up   | 2.73   | 0.28 | up   |
| MSTRG.16915 | -1.36  | 0.28 | down | 1.87   | 0.26 | up   |
| MSTRG.16949 | -1.52  | 0.25 | down | -1.55  | 0.37 | down |
| MSTRG.16958 | 17.80  | 0.00 | up   | 17.39  | 0.00 | up   |
| MSTRG.16986 | 1.21   | 0.48 | up   | 1.24   | 0.47 | up   |
| MSTRG.16997 | -1.45  | 0.22 | down | -1.46  | 0.25 | down |
| MSTRG.16998 | -2.71  | 0.18 | down | -2.03  | 0.12 | down |
| MSTRG.17030 | -5.35  | 0.01 | down | -1.74  | 0.22 | down |
| MSTRG.17055 | 13.64  | 0.00 | up   | -1.60  | 0.31 | down |
| MSTRG.17093 | -1.65  | 0.26 | down | -1.94  | 0.16 | down |
| MSTRG.17118 | 1.64   | 0.35 | up   | -1.98  | 0.54 | down |
| MSTRG.17143 | -3.35  | 0.16 | down | -1.15  | 0.50 | down |
| MSTRG.17200 | 1.34   | 0.25 | up   | 1.18   | 0.35 | up   |
| MSTRG.17210 | -1.51  | 0.28 | down | 1.87   | 0.19 | up   |
| MSTRG.17265 | -2.45  | 0.14 | down | -1.20  | 0.50 | down |
| MSTRG.17380 | 1.13   | 0.39 | up   | 1.03   | 0.44 | up   |

|             |        |      |      |        |      |      |
|-------------|--------|------|------|--------|------|------|
| MSTRG.17607 | -3.44  | 0.00 | down | -3.71  | 0.00 | down |
| MSTRG.17608 | 3.15   | 0.00 | up   | 2.76   | 0.01 | up   |
| MSTRG.17642 | -1.09  | 0.32 | down | -1.05  | 0.43 | down |
| MSTRG.17710 | -6.26  | 0.02 | down | -4.57  | 0.08 | down |
| MSTRG.17718 | 1.36   | 0.36 | up   | 1.14   | 0.43 | up   |
| MSTRG.17816 | -4.34  | 0.03 | down | -1.04  | 0.49 | down |
| MSTRG.1795  | 2.02   | 0.53 | up   | -10.74 | 0.00 | down |
| MSTRG.17989 | -12.26 | 0.00 | down | 1.29   | 0.23 | up   |
| MSTRG.18064 | 1.75   | 0.39 | up   | 1.65   | 0.24 | up   |
| MSTRG.18115 | 2.25   | 0.36 | up   | 3.06   | 0.22 | up   |
| MSTRG.18145 | 1.38   | 0.48 | up   | 1.23   | 0.61 | up   |
| MSTRG.18201 | -2.08  | 0.27 | down | -1.53  | 0.43 | down |
| MSTRG.18208 | -1.19  | 0.27 | down | -1.33  | 0.25 | down |
| MSTRG.18240 | -3.75  | 0.12 | down | -6.80  | 0.01 | down |
| MSTRG.18260 | -1.13  | 0.41 | down | -1.32  | 0.35 | down |
| MSTRG.18261 | 12.61  | 0.00 | up   | -3.21  | 0.17 | down |
| MSTRG.18296 | -3.40  | 0.04 | down | -4.11  | 0.05 | down |
| MSTRG.18526 | 1.85   | 0.09 | up   | 1.38   | 0.20 | up   |
| MSTRG.18572 | 1.04   | 0.45 | up   | 1.75   | 0.20 | up   |
| MSTRG.18625 | -2.13  | 0.25 | down | -1.89  | 0.36 | down |
| MSTRG.19035 | -1.75  | 0.22 | down | -1.85  | 0.20 | down |
| MSTRG.19036 | -1.80  | 0.46 | down | -6.56  | 0.01 | down |
| MSTRG.19088 | -1.22  | 0.35 | down | -1.21  | 0.36 | down |
| MSTRG.19096 | -12.06 | 0.00 | down | -6.14  | 0.02 | down |
| MSTRG.19148 | -5.56  | 0.01 | down | 1.35   | 0.45 | up   |
| MSTRG.19200 | -1.18  | 0.33 | down | -1.53  | 0.28 | down |
| MSTRG.19238 | 1.99   | 0.28 | up   | 1.99   | 0.18 | up   |
| MSTRG.19249 | 5.95   | 0.00 | up   | -2.81  | 0.03 | down |
| MSTRG.19326 | 13.16  | 0.00 | up   | 13.16  | 0.00 | up   |
| MSTRG.19390 | -2.50  | 0.02 | down | -1.11  | 0.29 | down |
| MSTRG.19527 | -2.05  | 0.14 | down | -1.58  | 0.22 | down |
| MSTRG.19528 | -2.51  | 0.11 | down | -1.58  | 0.24 | down |
